# Acidity of expiratory aerosols controls the infectivity of airborne influenza virus and SARS-CoV-2

Beiping Luo<sup>1,†</sup>, Aline Schaub<sup>2,†</sup>, Irina Glas<sup>3,†</sup>, Liviana K. Klein<sup>1,†</sup>, Shannon C. David<sup>2</sup>, Nir Bluvshstein<sup>1</sup>, Kalliopi Violaki<sup>4</sup>, Ghislain Motos<sup>4</sup>, Marie Pohl<sup>3</sup>, Walter Hugentobler<sup>4</sup>, Athanasios Nenes<sup>4,5</sup>, Ulrich K. Krieger<sup>1</sup>, Silke Stertz<sup>3</sup>, Thomas Peter<sup>1,\*</sup>, and Tamar Kohn<sup>2,\*</sup>

<sup>1</sup>Institute for Atmospheric and Climate Science, ETH Zurich, Zurich, Switzerland; <sup>2</sup>Environmental Chemistry Laboratory, School of Architecture, Civil and Environmental Engineering, Ecole Polytechnique Fédérale de Lausanne (EPFL), Lausanne, Switzerland; <sup>3</sup>Institute of Medical Virology, University of Zurich, Zurich, Switzerland; <sup>4</sup>Laboratory of Atmospheric Processes and their Impacts, School of Architecture, Civil and Environmental Engineering, Ecole Polytechnique Fédérale de Lausanne (EPFL), Lausanne, Switzerland; <sup>5</sup>Institute of Chemical Engineering Sciences, Foundation for Research and Technology Hellas, Patras, Greece; <sup>†</sup>these authors contributed equally to this work; \* Corresponding authors: [tamar.kohn@epfl.ch](mailto:tamar.kohn@epfl.ch) and [thomas.peter@env.ethz.ch](mailto:thomas.peter@env.ethz.ch)

This manuscript was compiled on June 20, 2022

1 **Enveloped viruses are prone to inactivation when exposed to strong acidity levels character-**  
2 **istic of atmospheric aerosol. Yet, the acidity of expiratory aerosol particles and its effect on**  
3 **airborne virus persistence has not been examined. Here, we combine pH-dependent inactiva-**  
4 **tion rates of influenza A virus and SARS-CoV-2 with microphysical properties of respiratory**  
5 **fluids using a biophysical aerosol model. We find that particles exhaled into indoor air be-**  
6 **come mildly acidic (pH  $\approx$  4), rapidly inactivating influenza A virus within minutes, whereas**  
7 **SARS-CoV-2 requires days. If indoor air is enriched with non-hazardous levels of nitric acid,**  
8 **aerosol pH drops by up to 2 units, decreasing 99%-inactivation times for both viruses in small**  
9 **aerosol particles to below 30 seconds. Conversely, unintentional removal of volatile acids from**  
10 **indoor air by filtration may elevate pH and prolong airborne virus persistence. The overlooked**  
11 **role of aerosol pH has profound implications for virus transmission and mitigation strategies.**

## 1 Introduction

2 Respiratory viral infections pose a great burden on human health. An average of 400,000 deaths are  
3 associated with influenza globally each year (1), and the ongoing COVID-19 pandemic has already  
4 resulted in several million deaths and countless cases of long COVID around the world. To curb  
5 the public health and economic impacts of these diseases, health care policy aims to minimize virus  
6 transmission. Increasing evidence points to expiratory aerosol particles (see (2) for clarification  
7 of terminology) as vehicles for the transmission of influenza virus and SARS-CoV-2 (3). The  
8 persistence of these viruses in aerosols is still subject to scientific debate, but it is undisputed that  
9 rapid inactivation would contribute to limiting their spread.

10 Prior studies have investigated the effect of ambient conditions on the inactivation rates of aerosolized  
11 respiratory viruses including influenza virus (4–9), SARS-CoV-2 (10–12), and the common cold  
12 human coronavirus HCoV-229E (13). Relative humidity (RH) and temperature were the primary  
13 variables modulated in these works, with low ( $\sim$  20%), medium (40-60%), and high (65-90%) RH  
14 compared at a few select temperatures. Some of these studies identified a ‘U-shaped’ curve of  
15 inactivation as a function of RH (4, 7), and it has been suggested that RH affects virus inactivation  
16 by controlling evaporation of water from the aerosol particle, thus governing the concentration  
17 of inactivation-catalysing solutes (14–16). Beyond this, the mechanism(s) of virus inactivation in  
18 aerosol particles remain largely speculative.

19 A potentially powerful, yet understudied driver of airborne virus inactivation is the aerosol pH.

20 It is established now that aerosol particles can be highly acidic (17), and that some enveloped  
21 viruses, including influenza virus, are sensitive to low pH (18). Nevertheless, though previously  
22 hypothesized to be a determinant of virus fate (19), the pH of expiratory aerosol particles, and hence  
23 its contribution to the inactivation of airborne viruses, remains unknown. The aerosol pH depends  
24 on the composition of the aerosol particle and the surrounding air, and it is well characterized for  
25 particulate matter equilibrated with inorganic acids and bases (20). Some studies have investigated  
26 the role of matrix composition on virus inactivation in particles, including its protective properties  
27 (7, 8, 21). However, the impact of air composition beyond RH has been overlooked by scientists  
28 to date. To the best of our knowledge, the only attempt to inactivate airborne viruses by - likely  
29 inadvertently - modulating aerosol pH is the use of acetic acid from boiling vinegar during the  
30 2002/03 outbreak of SARS-CoV-1 (see (22) and Supplementary Text).

31 Outdoor airborne particulate matter is often highly acidic, with pH values ranging between -1  
32 and +5 (17, 20). Contrary to expectations, the strength of the acid or base contained in aerosols  
33 (expressed by its dissociation constants) may not be the dominant parameter controlling aerosol pH.  
34 Rather, the volatility of species is of importance. For example, strong organic acids like HCOOH  
35 and CH<sub>3</sub>COOH partition negligibly to aerosol and bear a minor impact on aerosol pH for most  
36 atmospherically relevant conditions (23). In contrast, HNO<sub>3</sub> and NH<sub>3</sub> partition into aerosol particles  
37 and impact pH, albeit buffered by the formation of ammonium nitrate.

38 Indoor aerosol particles have a variety of sources, including outdoor air, human transpiration and  
39 respiration, and building materials. Indoor air tends to have lower levels of gas-phase inorganic  
40 acids (e.g., HNO<sub>3</sub>) than outdoor air, owing to their condensation on aerosol particles as well as  
41 their efficient removal via deposition on surfaces. Human activities are a source of organic acids and  
42 NH<sub>3</sub> (20, 24, 25), often elevating their levels compared to outdoors. The ratio of indoor to outdoor  
43 concentrations is typically 0.1-0.5 for HNO<sub>3</sub> and 3-30 for NH<sub>3</sub>, causing the pH of indoor aerosol  
44 particles to increase compared to outdoor levels. Operation of humidification, ventilation, and air  
45 conditioning (HVAC) systems also affect air composition (26) and, hence, likely the pH of indoor  
46 aerosol particles. While many outdoor and indoor aerosol particles are in equilibrium with their  
47 environment, this can only be expected for exhaled aerosol if given enough time. In the interim,  
48 freshly exhaled aerosol can change its pH considerably.

49 Exhaled air, before mixing into the indoor air, contains high concentrations of ammonia and is  
50 characterized by very high concentrations of CO<sub>2</sub> and high number densities of expiratory aerosol  
51 particles. These particles are emitted by breathing, talking, coughing or sneezing, and contain a  
52 complex aqueous mixture of ions, proteins and surfactants. Although the pH of exhaled breath  
53 condensate has been investigated (27), there is no study that quantifies the pH of respiratory aerosol  
54 - especially when it equilibrates with the acidic or alkaline gases present in the indoor air within a  
55 few seconds to minutes of exhalation.

56 Here, we investigate the role of aerosol acidity in the inactivation of airborne influenza A virus (IAV)  
57 and two coronaviruses, SARS-CoV-2 and HCoV-229E in indoor environments. We accomplish this  
58 in three steps by first determining the pH-dependent inactivation kinetics of IAV, SARS-CoV-2 and  
59 HCoV-229E in bulk samples of representative respiratory fluids, then measuring the thermodynamic  
60 and kinetic properties of microscopic particles of these fluids, and finally jointly applying the  
61 inactivation kinetics and aerosol properties in a biophysical model to determine inactivation in the

62 aerosol system. We then use the model to investigate the possibility of using gaseous nitric acid  
63 ( $\text{HNO}_3$ ) in indoor environments at non-hazardous concentrations to lower the pH of respiratory  
64 aerosol for a wide range of sizes, and thus to effectively reduce the risk of transmission.

## 65 **Results and Discussion**

### 66 **Kinetics of pH-mediated inactivation of influenza virus and coronavirus**

67 Inactivation kinetics of IAV (strain A/WSN/33), SARS-CoV-2 (BetaCoV/Germany/BavPat1/2020)  
68 and HCoV-229E (strain HCoV-229E-Ren) were determined over a pH range from neutral to strongly  
69 acidic, after immersion in bulk solutions of synthetic lung fluid (SLF; see Table S1 for composition),  
70 mucus harvested from primary epithelial nasal cultures grown at air-liquid interface (nasal mucus) or  
71 aqueous citric acid/ $\text{Na}_2\text{HPO}_4$  buffer. Figure 1 summarizes the inactivation times (here expressed as  
72 the time to reach a 99% infectivity loss) as a function of pH. All viruses were stable in all matrices at  
73 neutral pH, with inactivation times of several days. From pH 6 to 4, IAV inactivation times decreased  
74 from days to seconds, or by about five orders of magnitude. This decrease was evident in all matrices  
75 studied. It is noteworthy that inactivation in nasal mucus, which is most representative of the matrix  
76 comprising expiratory aerosol particles, is well described by SLF. However, inactivation times did  
77 depend on the SLF concentration. Specifically, we determined IAV inactivation at three different  
78 levels of SLF enrichment ( $1\times$  and  $18\times$  SLF, determined experimentally;  $24\times$  SLF, determined by  
79 extrapolation), corresponding to water activities  $a_w = 0.994$ ,  $0.8$  and  $0.5$ . This represents the fluid  
80 in equilibrium with a gas phase at 99.4%, 80% and 50% RH, i.e. from physiological equilibrium to  
81 common indoor conditions. While inactivation times in aqueous buffer,  $1\times$  SLF and nasal mucus  
82 were very similar,  $18\times$  enrichment of the SLF coincided with an increase in inactivation time by  
83 up to a factor 56 (blue triangles in Fig. 1). This protective effect of concentrated SLF was most  
84 prominent around the optimal pH for A/WSN/33 viral fusion of  $\sim 5.1$  (28). Coronaviruses were  
85 less affected by acidic pH than IAV. Both, SARS-CoV-2 and HCoV-229E remained largely stable  
86 down to pH 3, where their inactivation still required 24 hours. When further decreasing pH down  
87 to 2, the inactivation times rapidly reduced to  $< 10$  seconds for SARS-CoV-2, but never dropped  
88 below 2 hours for HCoV-229E. Compared to aqueous buffer, SLF provided some protection against  
89 inactivation below pH 3, both at  $1\times$  and  $5\times$  SLF concentrations (while measurements for pH  $< 3$   
90 in  $18\times$  SLF were not possible due to precipitation). The measured differences in pH-sensitivities  
91 between IAV and the coronaviruses may be explained by their different mechanisms of virus entry  
92 into host cells. IAV relies on an acid-induced conformational change in haemagglutinin during  
93 endosomal entry. This conformational change is irreversible (29); if IAV encounters the fusion pH  
94 (typically pH  $< 5.5$ ) outside the host cell, e.g. whilst within an aerosol particle, the acid-triggered  
95 haemagglutinin can no longer bind to host-cell receptors and the virus is inactivated. Conversely, the  
96 spike glycoprotein of coronaviruses becomes fusion competent through cleavage by host proteases,  
97 instead of relying on acidic pH triggering conformational changes(30). The different behavior of  
98 SARS-CoV-2 and HCoV-229E at pH  $< 3$  remains unclear.

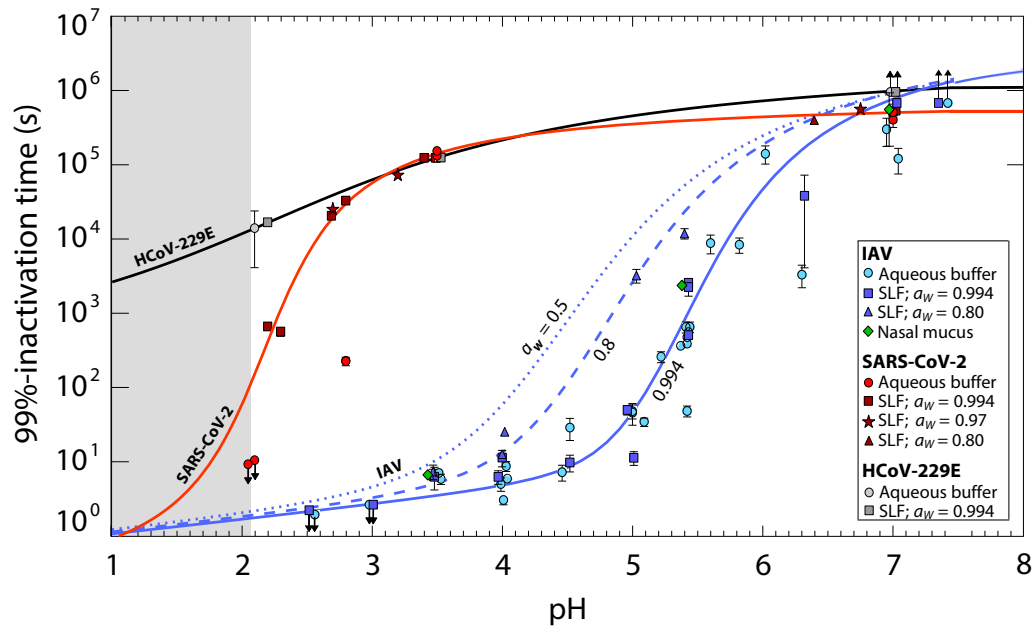

**Fig. 1.** Time required for 99% titer reduction of influenza A virus (IAV), SARS-CoV-2 and human coronavirus HCoV-229E in various bulk media. Data points represent inactivation times in aqueous citric acid/ $\text{Na}_2\text{HPO}_4$  buffer, synthetic lung fluid (SLF) or nasal mucus with pH between 7.4 and 2, measured at 22°C. SLF concentrations correspond to water activity  $a_w = 0.994$  (1× SLF; squares),  $a_w = 0.97$  (5× SLF; stars) and  $a_w = 0.8$  (18× SLF; triangles); buffer (circles) and nasal mucus (diamonds) correspond to  $a_w \sim 0.99$ . Each experimental condition was tested in replicate with error bars indicating 95% confidence intervals. While IAV displays a pronounced reduction in infectivity around pH 5, SARS-CoV-2 develops a similar reduction only close to pH 2, and HCoV-229E is largely pH-insensitive. Solid lines are arctan fits to SLF data with  $a_w = 0.994$  (blue: IAV; red: SARS-CoV-2; black: HCoV-229E). The dashed line is an arctan fit to the SLF data with  $a_w = 0.80$ . The dotted line is an extrapolation to  $a_w = 0.5$  (24× SLF). Upward arrows indicate insignificant change in titer over the course of the experiment, and downward arrows indicate inactivation below the level of detection at all measured times. The fitted curves below pH 2 (grey shaded area) are extrapolated with high uncertainty. Examples of measured inactivation curves are shown in Fig. S1. The arctan fit equations, which are also used for the model simulations, are given by Eqns. S21, S22, and S23.

## 99 Thermodynamics and diffusion kinetics of expiratory particles

100 While Figure 1 shows the pH that must be attained in the aerosol particles for rapid virus inactivation,  
 101 it lacks information on aerosol particle pH after exhalation into indoor air. To model the pH in  
 102 these particles it is essential to know the particle composition in thermodynamic equilibrium (liquid  
 103 water content), as well as the kinetics that determine how rapidly the equilibrium is approached  
 104 (water and ion diffusion coefficients). To obtain this information, we measured thermodynamic  
 105 (equilibrium) and kinetic (diffusion-controlled) properties of individual micrometer-sized SLF and  
 106 nasal mucus particles levitated contact-free in an electrodynamic balance (EDB). Each particle was  
 107 exposed to prescribed changes in RH (see Fig. 2).

108 Figure 2A shows two moistening/drying cycles of an SLF particle obtained over a period of two  
 109 days. They allow determination of the particle equilibrium composition (water content or mass

110 fraction of solutes, see Fig. S2A) during time intervals with slowly changing RH. The particle clearly  
111 takes up and loses water when the RH is changed. It has a size growth factor at 90% RH of 1.3 (see  
112 also Fig. S3) and deliquesces at 75%, indicating that NaCl is the predominant salt in the particle.  
113 Nasal mucus shows a similar size growth, but deliquesces over an RH range of 55 to 70%, indicating  
114 that it contains significant amounts of other salts (Fig. S3). We have no evidence for liquid-liquid  
115 phase separation in any of these particles (Fig. S4A and S5) but Mie-Resonance spectra indicate  
116 inhomogeneities in the particles even at high RH.

117 The kinetics of water uptake/loss as derived from periods with rapid RH change or efflorescence  
118 are highlighted in Fig. 2. Figure 2B zooms in on one efflorescence event, first showing rapid water  
119 loss ( $< 10$  s), then switching to a much slower rate of water loss over the next hour. This two-stage  
120 diffusion process was confirmed in measurements of additional SLF and nasal mucus particles (see  
121 Fig. S6). We attribute the fast process to an initial dendritic growth of an NaCl crystal (Fig.  
122 S4A-C), which ends abruptly when the crystal reaches the droplet surface, followed by a slow crystal  
123 growth mode (Fig. S4D). Initially, crystal growth is limited by the liquid phase diffusivity of water  
124 molecules with  $D_{\ell, \text{H}_2\text{O}} > 10^{-7}$  cm<sup>2</sup>/s (Fig. 2C), which is expelled from the particle as long as water  
125 activity is still high. Subsequently, the slow crystal growth is limited by the diffusivities of Na<sup>+</sup> and  
126 Cl<sup>-</sup> ions through the progressively viscous liquid to the crystal (Fig. S4D). From Figs. 2B and  
127 S4D we estimate the ion diffusion coefficient to be about  $D_{\ell, \text{ions}}^* \approx 10^{-10}$  cm<sup>2</sup>/s, which determines  
128 the low rate of continued loss of water molecules. The diffusion coefficients determined in this way  
129 are "effective" (indicated by a star), as they represent the molecular diffusivities under the specific  
130 morphological conditions associated with the dendritic growth of the salt crystals inside the droplets  
131 (see next section for details on how these diffusion coefficients were further constrained).

132 Independent of the exact thermodynamic equilibrium state of the particles, our results demonstrate  
133 that SLF as well as nasal mucus show a clear diffusion limitation for ions. In contrast, water diffusion  
134 in SLF and nasal mucus remains fast even when RH is low. This continuous, rapid diffusion of water  
135 indicates that SLF and nasal mucus do not form diffusion-inhibiting, semisolid phase states such as  
136 those recently reported by others in particles containing model respiratory compounds (31).



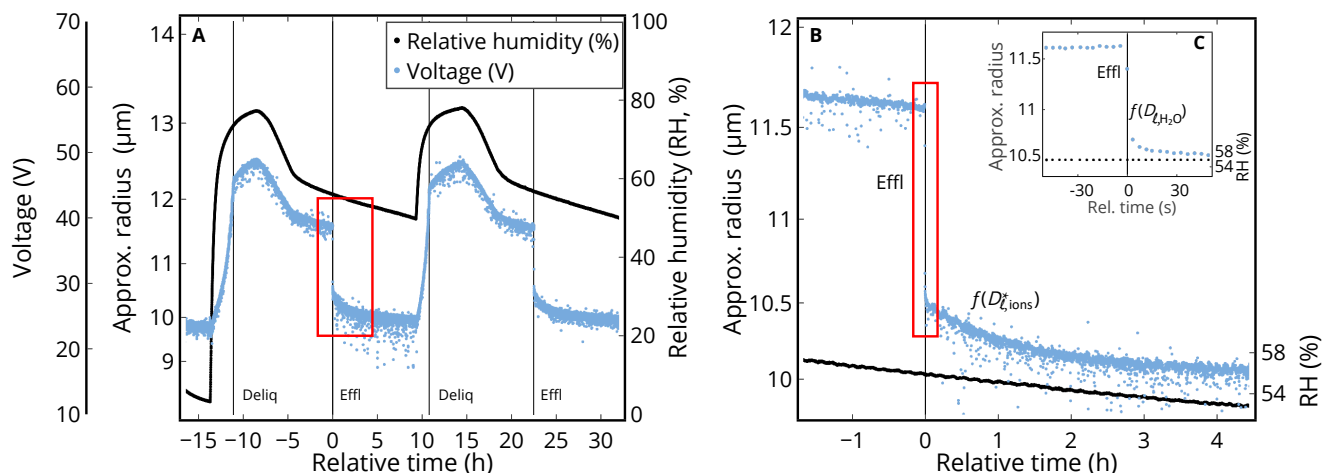

**Fig. 2.** Measured hygroscopicity cycles of a synthetic lung fluid (SLF) particle in an electrodynamic balance (EDB) forced by prescribed changes in relative humidity (RH). The voltage required to balance the particle in the EDB against gravitational settling and aerodynamic forces is a measure of the particle's mass-to-charge ratio, allowing the particle radius  $R$  to be estimated. (A) Two humidification cycles of an SLF particle with a dry radius  $R_0 \sim 9.7 \mu\text{m}$ . The experiment spanned about 2 days with slow humidity changes, allowing the thermodynamic and kinetic properties of SLF to be determined. Deliquescence/efflorescence points are marked by "Deliq/Effl". (B) Zoom on the drying phase (red box in (A)) with salts in the droplet (mainly NaCl) efflorescing around 56% RH (black line): very fast initial crystal growth ( $< 10$  s) with rapid loss of  $\text{H}_2\text{O}$  from the particle, followed by slow further crystal growth (1 h). The latter is caused by the abrupt switch from  $\text{H}_2\text{O}$  diffusion to the diffusion of  $\text{Na}^+$  and  $\text{Cl}^-$  ions through the viscous liquid, resulting in an ion diffusion coefficient of  $D_{\ell, \text{ions}}^* \approx 10^{-10} \text{ cm}^2/\text{s}$ . The insert (C) highlights the minute before and after efflorescence, which allows a lower bound of the  $\text{H}_2\text{O}$  diffusivity to be determined, namely  $D_{\ell, \text{H}_2\text{O}} > 10^{-7} \text{ cm}^2/\text{s}$ .

### 137 Biophysical model of inactivation in expiratory aerosol particles

138 Only the combination of the virological bulk phase data (Fig. 1) with the microphysical aerosol  
 139 thermodynamics (vapor pressures and activity coefficients) and kinetics (Figs. 2 and S7) allows the  
 140 pH attained in the aerosol particles and the resulting rates of viral inactivation, to be determined.  
 141 Thus, the virological and microphysical data were combined as input for a multi-layer Respiratory  
 142 Aerosol Model (ResAM). ResAM is a biophysical model that simulates the composition and pH  
 143 changes inside an expiratory particle during exhalation, and determines the impact of these changes  
 144 on virus infectivity (see section "Biophysical modeling" and Supplementary Material). The model  
 145 performs calculations for particles of selectable size (from 20 nm to 1 mm) with a liquid phase  
 146 composed of organic and inorganic species representative of human respiratory fluids S1 (more detail  
 147 in ). It takes account of diffusion in the gaseous and condensed phase, vapor pressures, heat transfer,  
 148 deliquescence, efflorescence, species dissociation, and activity coefficients due to electrolytic ion  
 149 interactions (see Tables S2, S3). Ultimately, ResAM computes the species distribution and their  
 150 activity in the liquid, the resulting pH, and the corresponding virus inactivation rates as function of  
 151 time and of the radial coordinate within the particle.

152 When RH changes are slow, the measured mass fraction of solutes in SLF as a function of RH  
 153 allows the model thermodynamics to be constrained (Fig. S2B). Under thermodynamic equilibrium

154 conditions the model captures the mass fraction of solutes along the deliquesced and effloresced  
155 branches of the particle reasonably well. However, only after kinetic effects (ion and water diffusivities)  
156 are also taken into account does the model accurately reproduce the solute composition curve along  
157 the deliquesced branch. This demonstrates that even when RH changes are slow (raising RH from  
158 50% to 70% in over one hour), kinetics cannot be neglected.

159 For rapidly evaporating expiratory particles, kinetics effects are even more critical. By matching  
160 the model to the fast changes during the efflorescence and deliquescence processes, ion diffusion  
161 coefficients can be derived for different water activities. Interpolation together with literature data  
162 in dilute conditions yields  $D_{\ell, \text{H}_2\text{O}}$ ,  $D_{\ell, \text{Na}^+}$ , and  $D_{\ell, \text{Cl}^-}$  (for details see Fig. S7D). Other neutral  
163 species, cations and anions are treated accordingly, scaled with their infinite dilution values (see  
164 Supplementary Material).

165 As an example, Fig. 3 shows the evolution of the physicochemical conditions within an expiratory  
166 particle with 1  $\mu\text{m}$  initial radius during transition from nasal to typical indoor air conditions with  
167 50% RH (Table S1), and the concomitant inactivation of IAV and SARS-CoV-2 contained within  
168 the particle. The rapid loss of water leads to concentration of the organics and salts, to the point  
169 when NaCl effloresces. Nitric acid from the indoor air enters the particle readily, lowering its pH  
170 from an initial value of 6.6 (resulting from the high concentrations of  $\text{CO}_2$  and  $\text{NH}_3$  in the exhaled  
171 air) to pH 5 within  $\sim 10$  s. This, in turn, pulls  $\text{NH}_3$  into the particle, partly compensating the  
172 acidification. The pH further decreases to  $\sim 4$  within 2 minutes, then slowly approaches pH 3.7 due  
173 to further uptake of  $\text{HNO}_3$  from the room air. This result confirms the importance of trace gases  
174 in determining the pH of indoor aerosol particles (25). If only  $\text{CO}_2$  is considered, its volatilization  
175 from the particle would lead to an expected increase in pH after exhalation (32). Owing to aerosol  
176 acidification, rapid influenza virus inactivation occurs at  $\sim 2$  minutes, whereas SARS-CoV-2 (and  
177 the even more pH-tolerant HCoV-229E) remain infectious.

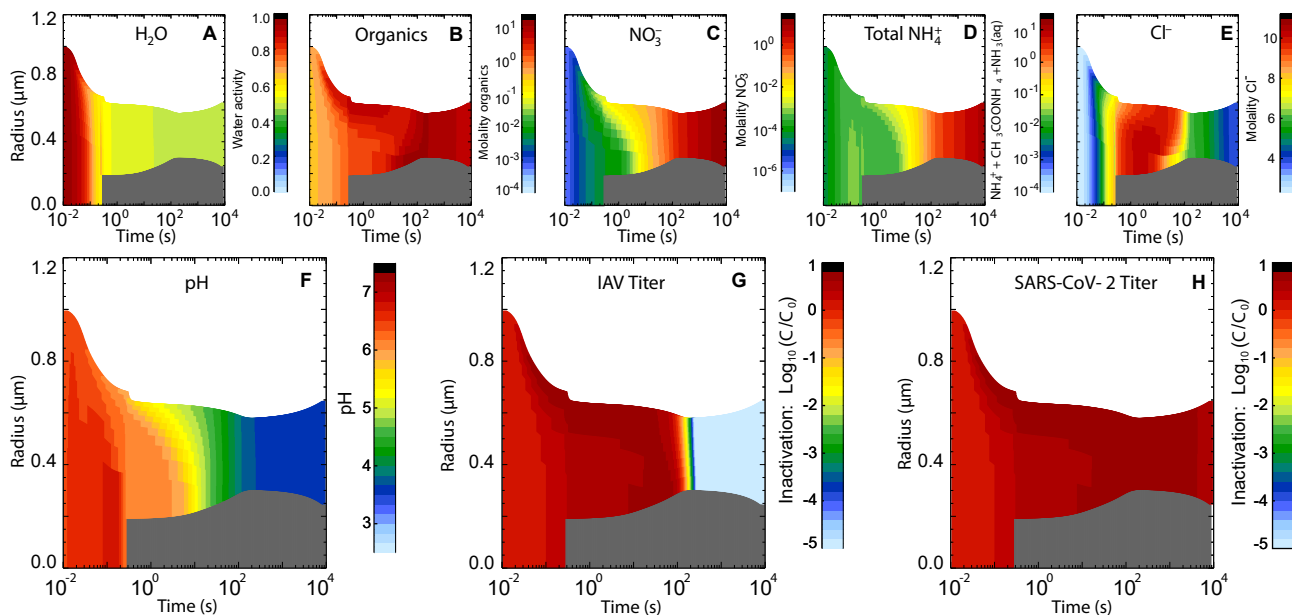

**Fig. 3. Evolution of physicochemical conditions within a respiratory particle leading to inactivation of trapped viruses during the transition from nasal to typical indoor air conditions, modeled with ResAM.** The initial radius of the particle is 1  $\mu\text{m}$ . Thermodynamic and kinetic properties are those of synthetic lung fluid (SLF, see Fig. 2 and Table S1). The indoor air conditions are set at 20°C and 50% RH (see Fig. S8 for the corresponding depiction of physicochemical conditions at 80% RH). The exhaled air is assumed to mix into the indoor air using a turbulent eddy diffusion coefficient of 50  $\text{cm}^2/\text{s}$  (see (33) and Supplementary Material, section "Mixing of the exhaled aerosol with indoor air"). The temporal evolution of gas phase mixing ratios is shown in Fig. S20. The gas phase compositions of exhaled and typical indoor air are given in Table S4. Within 0.3 s, the particle shrinks to 0.7  $\mu\text{m}$  due to rapid  $\text{H}_2\text{O}$  loss, causing  $\text{NaCl}$  to effloresce (grey core). The particle then reaches 0.6  $\mu\text{m}$  within 2 minutes due to further crystal growth, after which it slowly grows again due to coupled  $\text{HNO}_3$  and  $\text{NH}_3$  uptake and  $\text{HCl}$  loss. ResAM models the physicochemical changes in particles including (A) water activity, (B) molality of organics, (C)  $\text{NO}_3^-$  (resulting from the deprotonation of  $\text{HNO}_3$ ), (D) molality of total ammonium, (E) molality of  $\text{Cl}^-$ , (F) pH, as well as inactivation of (G) IAV and (H) SARS-CoV-2 (decadal logarithm of virus titer  $C$  at time  $t$  relative to initial virus titer  $C_0$ ).

178 Inactivation times vary with particle size: larger droplets take longer to reach low pH than smaller  
 179 ones as they are impeded by longer diffusion paths of the relevant molecules (mainly  $\text{HNO}_3$  and  $\text{NH}_3$ )  
 180 or ions through both the air and liquid phases. The black line in Fig. 4D illustrates this relationship  
 181 for IAV, showing 99% inactivation after about 2 minutes in particles with radii < 1  $\mu\text{m}$ , but longer  
 182 than 5 days for millimeter-sized particles. As a rule of thumb, a 10-fold increase in particle size leads  
 183 to roughly a 10-fold increase in IAV inactivation time under typical indoor conditions. Conversely,  
 184 the black line in Fig. 4E for SARS-CoV-2 shows that inactivation is inefficient for SARS-CoV-2,  
 185 irrespective of particle size.

186 Inactivation times for both IAV and SARS-CoV-2 can be greatly reduced if the indoor air is slightly  
 187 acidified. This can be achieved by either removing basic gases or adding acidic ones, provided that  
 188 the gaseous acid molecules meet two conditions: their volatility must be sufficiently low, such that



189 they readily partition from the gas phase to the condensed phase, and, once dissolved, they must be  
190 sufficiently strong acids to overcome any pH buffering by the particle matrix. Figure 4 compares the  
191 aerosol pH in typical indoor air (panel *A*) with that in air depleted in  $\text{NH}_3$  to 10 ppt (panel *B*), or  
192 enriched with 50 ppb  $\text{HNO}_3$  (panel *C*). This concentration of  $\text{HNO}_3$  is well below legal 8-h exposure  
193 thresholds (0.5 ppm (34) or 2 ppm (35)).

194 Scrubbing of  $\text{NH}_3$  reduces the time to reach an aerosol pH of 4 from minutes to seconds. Corre-  
195 spondingly, IAV inactivation times decrease by up to an order of magnitude (light blue lines in  
196 Fig. 4*D-E*). This acceleration is mostly limited to particles in the 2 to 5  $\mu\text{m}$  size range, which are  
197 minor contributors to the exhaled aerosol (Fig. 4*F*). Furthermore,  $\text{NH}_3$  scrubbing does not affect  
198 SARS-CoV-2 inactivation, because the aerosol pH remains in this virus' stability range (Fig. 1).

199 A much stronger effect is observed for the addition  $\text{HNO}_3$ . Here, 50 ppb allows the aerosol pH value  
200 to drop below 2, which is required for efficient SARS-CoV-2 inactivation (Fig. 1). For comparison,  
201 enriching the air with the more volatile and weaker acetic acid at concentrations below exposure  
202 threshold values could not achieve this, see Fig. S9. The dark blue lines in Fig. 4*D-E* show the  
203 resulting inactivation times for IAV and SARS-CoV-2 (and Fig. S10 for HCoV-229E) as a function  
204 of particle radius. Remarkably, inactivation times of SARS-CoV-2 diminished by 4-5 orders of  
205 magnitude compared to typical indoor air (black lines). For particles with radii  $< 1 \mu\text{m}$ , which  
206 constitutes the majority of expiratory particles (see panel *F*), inactivation is expected to occur  
207 within 30 s.

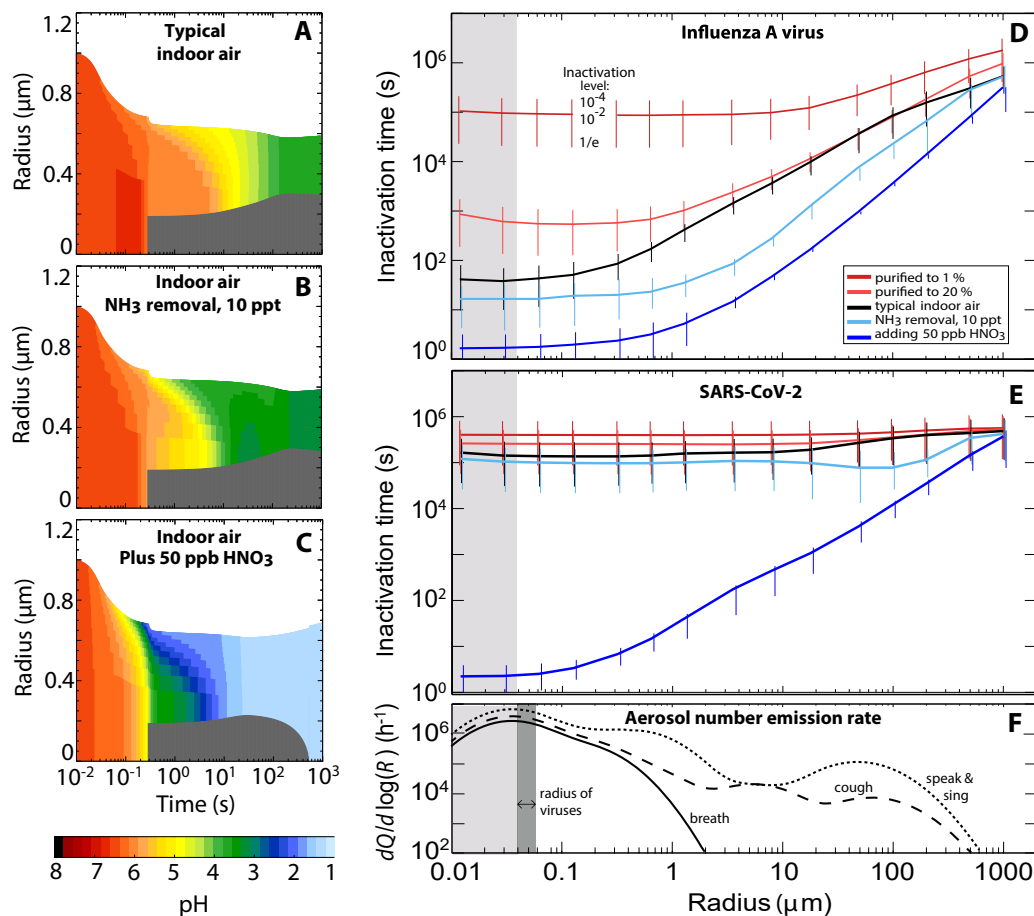

**Fig. 4. Impact of airborne acidity on virus inactivation in expiratory particles.** (A) Modeled pH value in a particle with properties of synthetic lung fluid with initially 1  $\mu\text{m}$  radius exhaled into air (20°C, 50% RH) with typical indoor composition (same as Fig. 3F). (B) Same as (A), but for indoor air with NH<sub>3</sub> reduced to 10 ppt, e.g., by means of an NH<sub>3</sub> scrubber, reducing the time to reach pH 4 from 2 minutes to less than 10 seconds. (C) Same as (A), but in indoor air enriched with 50 ppb HNO<sub>3</sub>, reducing the time to reach pH 4 from 2 minutes to less than 0.5 seconds. (D and E) Inactivation times of IAV and SARS-CoV-2 as function of particle radius under various conditions: indoor air with typical composition (black), depleted in NH<sub>3</sub> to 10 ppt (light blue), enriched with 50 ppb HNO<sub>3</sub> (dark blue), or purified air with both, HNO<sub>3</sub> and NH<sub>3</sub>, reduced to 20% or 1% (red). Whiskers show reductions of virus load to 10<sup>-4</sup> (upper end), 10<sup>-2</sup> (intersection with line) and 1/e (lower end). The exhaled air mixes with the indoor air by turbulent eddy diffusion (same as Fig. 3); for sensitivity tests on eddy diffusivity see Figs. S11B and S12B. The gas phase compositions of exhaled air and the various cases of indoor air shown here are defined in Table S4. (F) Mean size distribution (36) of number emission rates of expiratory aerosol particles ( $dQ/d\log(R)$ ) for breathing (solid line), speaking and singing (dotted line) and coughing (dashed line). Dark grey range indicates virus radii. Light grey shading shows conditions for particles smaller than a virus, referring to an equivalent coating volume with inactivation times indicated. (Radius values in (D)-(F) refer to the particle size 1 s after exhalation.)

208 While an enrichment of acidic gases in air leads to an acceleration of IAV and SARS-CoV-2  
 209 inactivation, the depletion of these gases, for instance by air filtration, has the opposite effect. It

210 is well-known that concentrations of strong inorganic acids, such as  $\text{HNO}_3$ , are lower indoors than  
211 outdoors by at least a factor 2, and in buildings with special air purification, such as museums  
212 and libraries, by factors 10-80 (25). If air is purified to contain only a fraction of the initial trace  
213 gas concentrations (see Table S4), the aerosol pH increases compared to typical indoor air and  
214 intermittently reaches neutral or even slightly alkaline values (up to pH 8.4 in particles with 5  $\mu\text{m}$   
215 radius in air purified to 1%). As a result, air purification is expected to enhance virus persistence,  
216 especially for IAV, as indicated by the red curves in Fig. 4D-E.

217 To validate the model results, we compared published inactivation data for aerosolized IAV and SARS-  
218 CoV-2 obtained in rotating drum experiments with inactivation times estimated by ResAM (Figures  
219 S13 and S14 and Supplementary Text). For both viruses, modelled and measured inactivation times  
220 exhibited similar trends as a function of RH. For IAV, measured inactivation times are consistent with  
221 ResAM predictions for experiments conducted in partly purified air, as is expected for rotating drum  
222 experiments. The comparison with SARS-CoV-2 is inconclusive, because of the wide scatter in the  
223 experimental data. However, ResAM predictions fall within the range of measured inactivation times.  
224 Given the importance of semi-volatile acids and bases for inactivation, further model validation  
225 should include inactivation times measured in aerosol experiments under well-known air compositions,  
226 including the presence of  $\text{HNO}_3$ .

## 227 **Management of airborne transmission risks**

228 Given the high pH sensitivity of many viruses (18, 37–39) and the readiness of expiratory aerosol  
229 particles for acidification, we next investigated the extent to which the modification of indoor air  
230 composition could mitigate the risk of virus transmission. To this end, we consider a ventilated room  
231 with occupants who exhale aerosol containing infectious viruses. We further make the assumption  
232 that, given the low concentration of airborne viruses, the transmission risk is directly proportional  
233 to the infectious virus concentration, respectively inhalation dose. We use the term "relative risk  
234 of transmission" to express how the risk changes from standard conditions (here typical indoor air  
235 according to Table S4) compared to air slightly enriched by  $\text{HNO}_3$ , scrubbed of  $\text{NH}_3$ , or air that has  
236 been purified.

237 For the ventilated room we assume steady-state conditions where the exhalation defines the source of  
238 virus, which is balanced by three sinks, namely air exchange through ventilation, aerosol deposition,  
239 and pH-moderated virus inactivation within the aerosol particles (see Supplementary Material). We  
240 describe the virus source by the mean size distributions of number emission rates of expiratory aerosol  
241 particles (Fig. 4F) and assume each particle with radius  $> 50$  nm to carry one virus irrespective of  
242 size. We describe the virus sinks by expressing ventilation by Air Change per Hour (ACH, mixing  
243 ventilation), applying mean aerosol deposition rates (40), and computing the inactivation rates  
244 similar to Fig. 4D-E. This allows the airborne viral load and, thus, the relative risk of transmission,  
245 to be calculated as displayed in Fig. 5 for IAV and SARS-CoV-2 (and Fig. S15 for HCoV-229E).  
246 Black bars show the results for typical indoor conditions, light blue bars indicate air from which  $\text{NH}_3$   
247 was scrubbed to 10 ppt, dark blue bars an enrichment of  $\text{HNO}_3$  to 50 ppb, and red bars indicate  
248 purification of air to 20% or 1% of trace gases (see Table S4).

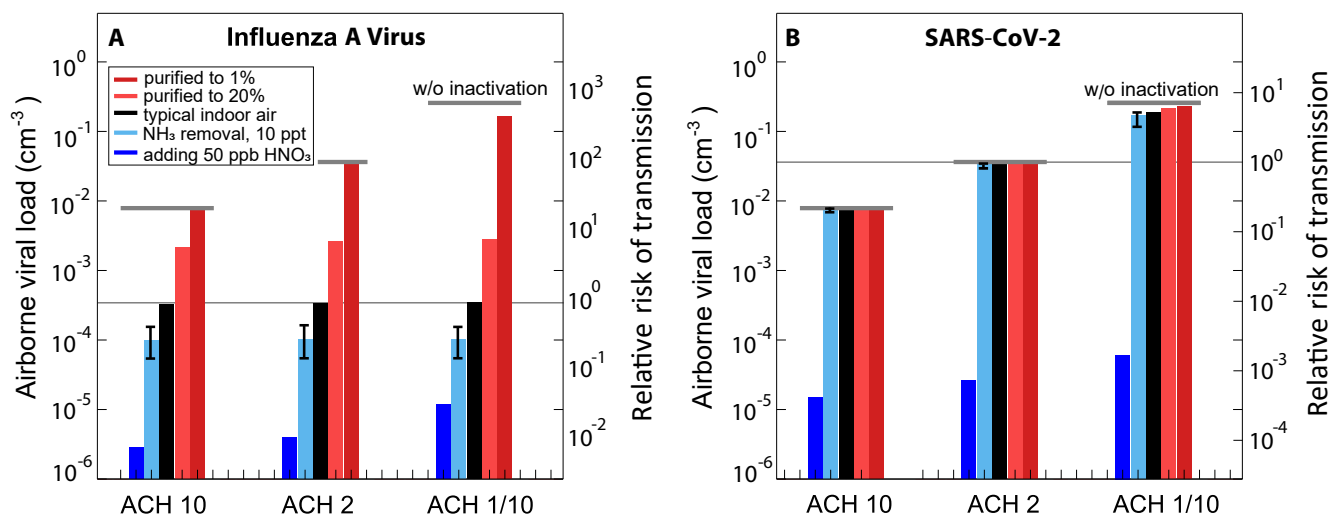

**Fig. 5. Airborne viral load and relative risk of IAV and SARS-CoV-2 transmission under different air treatment scenarios.** The airborne viral load (# viruses per volume of air) and relative risk of transmission of (A) IAV and (B) SARS-CoV-2 is calculated for a room with different ventilation rates, Air Changes per Hour (ACH), and subject to various air treatments, such as  $\text{NH}_3$  removal, addition of  $\text{HNO}_3$ , or supply of purified air. The room is assumed to accommodate one infected person per  $10 \text{ m}^3$  of air volume, emitting virus-laden aerosol by normal breathing (solid curve in Fig. 4E), and assuming one infectious virus per aerosol particle. (Corresponding plots assuming a virus concentration that is proportional to the size of the aerosol particles are shown in Fig. S16.) Steady state virus loading, i.e. number of infectious viruses per cubic centimeter of air (left axes), is calculated as the balance of exhaled viruses and their removal by ventilation, deposition, and inactivation. Results are shown for three different ventilation strengths. Virus inactivation is calculated according to Fig. 4D-E, starting from radius  $0.05 \mu\text{m}$ . Note, that the mixing speed of the exhalation plume with indoor air depends on ACH (following (33), see Supplementary Text). Right axes show the transmission risk under these treatments relative to the risk in a room with typical indoor air (see Table S4) and ACH 2 (thin horizontal line). Typical indoor air is shown by black bars, filtered air with removal of trace gases to 20% and 1% by red bars, air with  $\text{NH}_3$  removed to 10 ppt by light blue bars, and air enriched with 50 ppb  $\text{HNO}_3$  by dark blue bars. The lower and upper limits for the case with  $\text{NH}_3$  removal shows the range of possible  $\text{HNO}_3$  release from the background aerosol particles after removing  $\text{NH}_3$  from the indoor air (see Table S4). Thick grey horizontal lines indicate the viral load and relative transmission risk in the absence of any inactivation. Results for 2 and 5 ppb  $\text{HNO}_3$  are shown in Fig. S17. Results for HCoV-229E, along with analogous analyses for coughing and speaking/singing are shown in Fig. S15.

249 The results are unambiguous: adding 50 ppb  $\text{HNO}_3$  diminishes the relative risk of transmission of IAV  
 250 by a factor of  $\sim 20$  and of SARS-CoV-2 by a factor of 800 in rooms with ACH 2. Interestingly,  $\text{HNO}_3$   
 251 addition outperforms an increase in ventilation from ACH 2 to ACH 10, which for SARS-CoV-2  
 252 leads to a mere dilution by a factor 5 and for IAV does not help at all (black bars in Fig. 5). This  
 253 is because in typical indoor air, the 99%-inactivation times of IAV are much shorter than the air  
 254 exchange times, such that virus dilution plays no role. Upon enrichment of the air with 50 ppb  
 255  $\text{HNO}_3$ , inactivation times of IAV and SARS-CoV-2 drop to only a few seconds for small particles (Fig.  
 256 4D-E) and are now on the same time scale as  $\text{HNO}_3$  transport through the gas phase to the droplet

257 by ACH-induced eddy diffusion (see Supplementary Text). In this scenario, higher ACH leads to a  
258 faster mixing of the HNO<sub>3</sub>-enriched air into the exhaled plume, resulting in faster acidification of  
259 the exhaled aerosol, and hence a lower relative risk of transmission at higher ACH (dark blue bars  
260 in Fig. 5). In contrast, adding 50 ppb HNO<sub>3</sub> only has a moderate impact on HCoV-229E (Figs. S10  
261 and S15).

262 In comparison, NH<sub>3</sub> scrubbing has a small, though noticeable effect on the relative risk of IAV  
263 transmission, which is reduced by a factor 2-3 depending on the human activity (Figs. S15 and S16).  
264 This approach, however, is ineffective for SARS-CoV-2 or HCoV-229E, highlighting the importance  
265 of ventilation in such a scenario.

266 Finally, the ResAM estimates for purified air with significant reduction of trace gases (red bars) are  
267 also striking. While even normal air conditioning systems with air filters can lead to a reduction  
268 in "sticky" molecules such as HNO<sub>3</sub> (41), acid removal is likely even more pronounced in museums,  
269 libraries or hospitals with activated carbon filters (25). In such public buildings, the relative risk of  
270 IAV transmission can increase significantly compared to buildings supplied with unfiltered outside  
271 air.

272 In summary, we demonstrate that the control of aerosol pH is a critical tool in the mitigation of  
273 airborne virus transmission. A significant abatement in transmission risk can be achieved by air  
274 acidification. For strongly pH-sensitive viruses (e.g., IAV), mere scrubbing of NH<sub>3</sub> from indoor  
275 air suffices to bring about a modest reduction in the airborne viral load. A greater effect that  
276 also extends to more acid-tolerant viruses (e.g., SARS-CoV-2) results from air enrichment with  
277 an acidic gas. Here we evaluated the use of HNO<sub>3</sub> for this purpose, though alternative acids may  
278 achieve similar results. An effective reduction in viral load can already be achieved by applying  
279 HNO<sub>3</sub> at levels lower than 10% of the legal exposure thresholds (34, 35). We therefore expect that  
280 the resulting acid exposure will not cause harmful effects on human health. Nevertheless, future  
281 studies should investigate the consequences of acid accumulation in indoor air on the microbiome  
282 and immune response in the respiratory tract. Additionally, methods are needed for real-time  
283 monitoring of aerosol pH, both to prevent acid overexposure and to ensure efficient virus inactivation.  
284 Despite the current unknowns, targeted regulation of aerosol pH promises profound positive effects  
285 on airborne virus control. Practices that help acidify exhaled aerosols should thus be considered as a  
286 strategy to mitigate virus transmission and disease - alongside interventions such as ventilation that  
287 mechanically reduce the concentration of airborne viruses (i.e., dilution) and ensure the resupply of  
288 acid molecules from outside air.

## 289 **Materials and Methods**

### 290 **Virus propagation, purification and enumeration**

291 Influenza virus strain A/WSN/33 (H1N1) was propagated in Madin-Darby Canine Kidney (MDCK)  
292 cells (ThermoFisher) and the coronavirus strain HCoV-229E-Ren (kindly provided by Volker Thiel,  
293 University of Bern)(42) was propagated in Huh-7 cells (a kind gift from Mirco Schmolke, University of  
294 Geneva). SARS-CoV-2 strain BetaCoV/Germany/BavPat1/2020 was obtained from the European  
295 Virus Archive GLOBAL (EVA-GLOBAL; Ref-SKU: 026V-03883)(43) and propagated in VeroE6  
296 cells (kindly provided by Volker Thiel, University of Bern). All work with infectious SARS-CoV-  
297 2 was performed in an approved biosafety level 3 (BSL3) facility by trained personnel at the  
298 Institute of Medical Virology, University of Zurich. All procedures and protective measures were  
299 thoroughly risk assessed prior to starting the project and were approved by the Swiss Federal Office



300 of Public Health (Ecogen number A202808/3). The cells are maintained in Dulbecco's modified  
301 Eagle's medium (DMEM; Gibco) supplemented with 10% Fetal Bovine Serum (FBS; Gibco) and  
302 1% Penicillin-Streptomycin 10'000 U/ml (P/S; Gibco). MDCK, VeroE6 or Huh-7 cell cultures were  
303 inoculated with IAV, SARS-CoV-2 or HCoV-229E at a multiplicity of infection of 0.001, 0.001 and  
304 0.01, respectively, for 72 h. Culture supernatants were clarified by centrifugation at  $2,500 \times g$   
305 for 10 min, and IAV and HCoV-229E were pelleted through a 30% sucrose cushion at  $112,400 \times g$   
306 in a SW32Ti rotor (Beckman) or a AH-629 rotor (ThermoFisher Scientific) for 90 minutes at  
307 4°C. Pellets were recovered in phosphate-buffered saline (PBS) overnight. SARS-CoV-2 stocks were  
308 concentrated using Amicon Ultra-15, PLHK Ultracel-PL Membran, 100 kDa tubes (Millipore). The  
309 quantification of IAV, SARS-CoV-2 and HCoV-229E titers were done by standard plaque assay on  
310 MDCK, VeroE6 or Huh-7 cells respectively with an assay limit of detection (LoD) of 10 PFU/ml.  
311 A live-cell Renilla luciferase assay was used as an alternative quantification method to determine  
312 HCoV-229E titers in a high-throughput manner. The assay was performed as previously reported  
313 (44), on Huh-7 cells at 33°C using 6  $\mu\text{M}$  of the Renilla luciferase substrate EnduRen (Promega) and  
314 had an LoD of approximately 500 PFU/ml. Relative Light units were measured at regular intervals  
315 with the EnVision multilabel plate reader (PerkinElmer) and the areas under the curve (AUC) were  
316 determined. The system was calibrated using reference samples with known titers. All calculations  
317 were performed in GraphPad Prism 9.232.

### 318 **Matrix preparation**

319 Experiments were conducted in aqueous buffer and in two matrices representative of respiratory  
320 liquids: synthetic lung fluid (SLF) and nasal mucus. Aqueous buffer was prepared from 0.1 M  
321 citric acid (Acros Organics) and 0.2 M disodium phosphate (Fluka), mixed at varying proportions  
322 to obtain the targeted pH. The pH of each buffer was verified using a pH meter (Orion™Versa  
323 Star Pro™; ThermoFisher Scientific). SLF was prepared as described by Bicer (45), except that  
324 immunoglobulin G was omitted (Supp. Table S1). Hank's Balanced Salt Solution (HBSS) without  
325 phenol red, lyophilized albumin from human serum, human transferrin, 1,2-dipalmitoyl-sn-glycero-  
326 3-phosphocholine (DPPC), 1,2-dipalmitoyl-sn-glycero-3-phospho-rac-(1-glycerol) ammonium salt  
327 (DPPG), cholesterol, L-ascorbic acid, uric acid and glutathione were purchased from Sigma Aldrich.  
328 Liquid SLF was freeze-dried according to the method described by Hassoun *et al.* (46). To create  
329 SLF solutions of different enrichments (1×, 10× or 18×), SLF powder was resuspended in the  
330 corresponding volume of milli-Q water and was then acidified to the desired pH with 10% of 10×  
331 citric acid-phosphate buffer. Note that SLF enrichments beyond 18× were not experimentally  
332 feasible. Nasal mucus was prepared from Nasal Epithelial Cells (NEpCs) from three donors, a  
333 73-year-old male, a 50-year-old male and a 41-year-old female (Epithelix, Switzerland, # EP51AB).  
334 Cells were cultured in airway epithelium basal growth medium (Promocell) containing 10  $\mu\text{M}$  Y-27632  
335 (Tocris) and the according airway growth medium supplement pack (Promocell). The health and  
336 differentiation process of NEpCs into air-liquid interface (ALI) cultures were monitored by measuring  
337 the transepithelial electrical resistance and performing immunofluorescence as previously described  
338 (47). Mucus was harvested every 2 weeks by incubating NEpC ALI cultures on 24-mm PET filter  
339 inserts (Sarstedt) with 500  $\mu\text{l}$  of milli-Q water at 37°C for 10 min and collecting the wash. Mucus  
340 from the 3 different NEpC donors was combined and stored at -80°C. For inactivation experiments,  
341 mucus was thawed and acidified to the desired pH with 10% of 10x citric acid-phosphate buffer.

### 342 **Inactivation experiments**

343 Influenza and coronavirus inactivation were measured at room temperature in 2-ml glass vials  
344 (G085S-1-H; Infochroma), 500- $\mu\text{l}$  PCR tubes (Sarstedt), or 1.5 ml plastic tubes (Eppendorf), using

345 a matrix volume between 10  $\mu$ l and 1 ml. No effect of the reaction volumes on the inactivation  
346 kinetics was observed. Each experimental condition was tested in triplicate, except for a subset of  
347 SARS-CoV-2 experiments, which were performed in duplicate. IAV stock solutions were diluted  
348 with UltraPure Distilled Water (ThermoFisher Scientific) to reach an approximate titer of  $10^9$   
349 PFU/ml. Virus stocks were then spiked into each test matrix to an initial experimental titer of  
350  $10^7$  PFU/ml for IAV and HCoV-229E or  $3 \times 10^6$  PFU/ml for SARS-CoV-2. After spiking, vials  
351 were mixed for approximately 5 seconds at medium intensity. Samples were taken at regular time  
352 intervals and were neutralized by diluting 1:100 in PBS for infection (PBSi; PBS containing 3% of  
353 Bovine Serum Albumin solution 10% in DPBS (Sigma-Aldrich), 1% of P/S and 1% of  $\text{Ca}^{2+}/\text{Mg}^{2+}$   
354 100 mM ( $\text{CaCl}_2 \cdot 2 \text{H}_2\text{O}$  and  $\text{MgCl}_2 \cdot 6 \text{H}_2\text{O}$ , Acros Organics)). The PBSi has a pH of 7.3. In most  
355 experiments with  $\text{pH} < 3.5$ , PBSi was supplemented with 2% of  $10 \times$  citric acid-phosphate buffer at  
356 pH 7. Dilution in PBSi rather than addition of a strong base was chosen for sample neutralization  
357 because the latter approach was found to further decrease the virus titer. Neutralized samples were  
358 frozen until enumeration. To determine kinetic parameters, all replicate experiments of a given  
359 experimental condition were pooled. Inactivation rate constants were determined from least square  
360 fits to the log-linear portion of the inactivation curves, assuming pseudo-first order kinetics,

$$361 \quad \ln \frac{C}{C_0} = -k_{\text{obs}} \cdot t \quad [1]$$

362 Here,  $C$  is the virus titer at time  $t$ ,  $C_0$  is initial virus titer and  $k_{\text{obs}}$  is the observed inactivation rate  
363 constant. For measurements of  $C$  below the LoD,  $C$  was set to the LoD value. 99%-inactivation  
364 times ( $t_{99}$ ) were determined based on  $k_{\text{obs}}$ :

$$365 \quad t_{99} = -\frac{\ln(0.01)}{k_{\text{obs}}} \quad [2]$$

366 Rate constants and associated 95% confidence intervals were determined using GraphPad Prism v.  
367 9.232. Control experiments were performed to confirm that virus titer loss at low pH could not be  
368 attributed to virus aggregation (Fig. S18).

### 369 **Measurement of virus aggregate sizes by Dynamic Light Scattering (DLS)**

370 To measure the extent of virus aggregation, IAV was spiked into pH 5 or pH 7 citric acid-phosphate  
371 buffer, at a final concentration of  $10^{10}$  PFU/mL. The mean hydrodynamic diameter of viral particles  
372 in solution was automatically measured every 2 minutes by DLS using a Zetasizer Nano ZS light  
373 scattering instrument (Malvern Panalytical), for a total of 30 minutes. Additionally, samples at  
374 pH 5 were neutralized in the cuvette by addition of 2 M  $\text{Na}_2\text{HPO}_4$  at  $t = 30$  min, and rapidly  
375 mixed by pipetting. The mean hydrodynamic diameter was automatically measured every 2 min  
376 for an additional 60 min. Each buffer alone (no virus) was also measured for 10 min each with no  
377 particles detected above 10  $\mu$ m. All data were analyzed using Zetasizer Software 8.01.4906 (Malvern  
378 Panalytical).

### 379 **SLF characterization by (cryo-)transmission electron microscopy and DLS**

380 Transmission electron microscopy (TEM) was conducted using 15  $\mu$ l of freshly prepared SLF incubated  
381 for 2 minutes on a glow-discharged carbon-coated copper grid (400 mesh). After incubation the grid  
382 was washed with solution containing only HBSS (Table S1) and stained with uranyl acetate 2%  
383 for 30 seconds. Observations were made using a Tecnai F20 electron microscope (Thermo Fisher,

384 Hillsboro, USA) operated at 200 kV. Digital images were collected using a direct detector camera  
385 Falcon III (Thermo Fisher, Hillsboro, USA) 4098 X 4098 pixels using a defocus range between -1.5  
386  $\mu\text{m}$  and -2.5  $\mu\text{m}$ . The characterization of SLF by cryo-transmission electron microscopy (cryo-TEM)  
387 was performed using 5  $\mu\text{l}$  of freshly prepared SLF, which was applied onto lacey carbon film grids  
388 (300 microMesh, EMS). The grid was blotted in an automatic plunge freezing apparatus (Thermo  
389 Fisher, Hillsboro, USA) to control humidity and temperature. Observation was made at -170° C on  
390 the Tecnai F20 electron microscope, operated at 200 kV and equipped with a cryo-specimen holder  
391 Gatan 626 (Warrendale, PA, USA). Digital images were drift corrected using the camera Falcon III  
392 (Thermo Fisher, Hillsboro, USA) 4096 X 4096 pixels. The diameter of the particles in SLF solution  
393 was measured by DLS after mixing by vortex for 2 min.

### 394 **EDB measurements of aerosol thermodynamics and diffusion kinetics**

395 We used an electrodynamic balance (EDB) to measure the thermodynamic and kinetic properties  
396 of micrometer-sized SLF and nasal mucus particles under controlled conditions in the gas phase.  
397 The EDB is also called particle "trap", as it stabilizes (or traps) a slightly charged particle by  
398 electric fields in contact-free levitation. Therefore, it enables to investigate droplets, which are highly  
399 supersaturated with respect to precipitation of NaCl and other salts. These supersaturated states  
400 (see, e.g., efflorescence-deliqescence hysteresis in Fig. S3) occur regularly during exhalation, but are  
401 inaccessible for macroscopic measurements, because the contact with bulk containment walls readily  
402 leads to precipitation. Thermodynamic properties such as the particle water content in equilibrium  
403 with the gas phase are measured under constant or only very slowly changing conditions in the gas  
404 phase. In contrast, rapid changes, as those following crystal nucleation and subsequent efflorescence,  
405 enable the EDB to also determine the kinetics of fast crystal growth and diffusion processes inside a  
406 trapped particle.

407 The EDB consists of two hyperboloidal endcap electrodes and a central ring electrode with an AC  
408 field that stabilizes the particle horizontally, and a charged single particle is held at the null point of  
409 the balance by a DC field established across the endcaps (48). As we described previously (49, 50),  
410 we use the EDB to measure the relative changes in mass and radius of a single levitated particle  
411 caused by changes in RH with very high precision. In brief, using a droplet-on-demand generator a  
412 charged particle of SLF (2.5 $\times$  recipe concentrations) or of freshly thawed nasal mucus was injected  
413 into the temperature-regulated (15°C) and RH-controlled gas flow in the EDB and levitated by the  
414 adjustable DC electric field. The particle experiences three forces along the symmetry axis of the  
415 EDB, which balance each other:

$$416 \quad F_{\text{el}} = F_g + F_{\text{drag}}. \quad [3]$$

417 These are the gravitational force

$$418 \quad F_g = mg \quad [4]$$

419 and the Stokes drag force

$$420 \quad F_{\text{drag}} = 6\pi\eta Rv_{\text{gas}} \quad [5]$$

421 induced by the downward-oriented gas flow. Here,  $m$  denotes the mass,  $g$  the gravitational accelera-  
422 tion,  $\eta$  the dynamic viscosity of the gas,  $R$  the particle radius and  $v$  the velocity of the humidified  
423 N<sub>2</sub> gas flow through the EDB. These two forces are balanced by an electrical force,  $F_{\text{el}}$ , required to  
424 maintain the particle in the center of the trap,

$$F_{\text{el}} = \frac{CqU_{\text{DC}}}{2z}, \quad [6]$$

where  $2z$  is the minimum distance between the endcap electrodes,  $U_{\text{DC}}$  is the DC voltage between the electrodes,  $q$  is the charge on the particle, and  $C$  denotes a geometrical constant of the balance. Via Eq. 4,  $U_{\text{DC}}$  depends on the particle mass with a sensitivity to variations caused by loss or uptake of water vapor in the range of  $10^{-13}$  to  $10^{-12}$  g.

Close to thermodynamic equilibrium, the partitioning of  $\text{H}_2\text{O}$  between the gas and the condensed phase was examined by slowly (within hours to days) cycling RH in the EDB between dry ( $< 5\%$ ) and humid (ca.  $90\%$ ) conditions. The total  $\text{N}_2$  flow was set to 20 sccm (controlled by mass flow controllers). The RH was measured with a capacitance sensor, which was calibrated by observing the deliquescence of various salts. Its accuracy is estimated to be  $\pm 1.5\%$ .

To calibrate mass changes of trapped particles (or equivalently, their mass fraction of solutes), the particles were exposed to dry conditions (i.e., without  $\text{H}_2\text{O}$  exchange with the gas phase) to obtain the voltage corresponding solely to the gravitational force and the drag force at various flows. The voltage contributions due to gravity ( $U_0$ ) and drag ( $U_{\text{drag}}(0)$ ) were determined from linear regression of the measured voltage ( $U_m$ ) at various flows under dry conditions. Next, the force balance equation 3 was rearranged to obtain:

$$U_{\text{corr}}(\text{RH}) = U_m(\text{RH}) - U_{\text{drag}}(0) \cdot \left( \frac{U_{\text{corr}}(\text{RH})}{U_0} \right)^{\frac{1}{3}}. \quad [7]$$

Equation 7 was then analytically solved to retrieve the drag-independent voltage ( $U_{\text{corr}}(\text{RH})$ ). Therefore, at any RH, the mass fraction of solutes is given by  $U_0/U_{\text{corr}}(\text{RH})$ . It was previously shown that certain particle components may induce slow charge loss (51) over a period of hours to days. To correct for that, measurements under similar condition that demonstrated a difference of at least 1 V from cycle to cycle were linearly adjusted prior to the drag force correction.

To complete the analysis of particle composition, the relative change in radius was determined from relative changes in the wavelength of Mie resonances apparent in continuously recorded broad-band backscattering spectra (50, 52, 53) using the Chylek approximation (54). We first estimated the particle radius at 91% RH. Assuming a constant density and refractive index, we then obtained the radii at all other RH (50). This allows a highly accurate determination of particle radii, but we performed this evaluation only on a subset of our measurements, as the method relies on the particles being spherical (which is only approximately true for the inhomogeneous particles of interest in the present work).

## Biophysical modeling

The Respiratory Aerosol Model ResAM is a biophysical model to determine virus inactivation times in the exhalation aerosol as a function of air composition. ResAM is based on a spherical shell diffusion model, which we have previously applied in physical and chemical contexts (55–57). As novel input experimental data, ResAM uses the pH sensitivity of enveloped viruses and of the thermodynamic and kinetic properties of respiratory fluids, both measured in the present work.

ResAM simulates the composition and pH changes inside an exhalation particle during exhalation. Hereby we make the simplifying assumption that the mode of generation (breathing, coughing,

463 singing) does not influence the matrix composition. The model performs calculations for particles  
464 of selectable size (from 25 nm to 1 mm) with a liquid composed of  $\text{H}_2\text{O}$ ,  $\text{H}^+$ ,  $\text{OH}^-$ ,  $\text{Na}^+$ ,  $\text{Cl}^-$ ,  
465  $\text{CO}_2(\text{aq})$ ,  $\text{HCO}_3^-$ ,  $\text{NH}_3(\text{aq})$ ,  $\text{NH}_4^+$ ,  $\text{CH}_3\text{COOH}(\text{aq})$ ,  $\text{CH}_3\text{COO}^-$ ,  $\text{CH}_3\text{COONH}_4(\text{aq})$ ,  $\text{NO}_3^-$ , as well  
466 as two classes of organic compounds with low and a high molecular weight, representative of the  
467 lipids and proteins in the lung fluids of interest.

468 The liquid phase is divided into concentric shells (Fig. S19). The model treats 1-50 shells, depending  
469 on particle size (one shell for  $r = 0.02 - 0.1 \mu\text{m}$  and up to 50 shells for  $r = 1000 \mu\text{m}$ ). The number  
470 of shells for each particle stays constant during the exhalation process. The shells are treated in  
471 a fully Lagrangian manner, i.e., their thicknesses are calculated from the number of molecules of  
472 each species in a shell times their molecular volume, whereby diffusion processes between shells may  
473 cause each shell to evolve differently with time.

474 We take account of vapor pressures  $p_{\text{H}_2\text{O}}^{\text{vap}}$ ,  $p_{\text{NH}_3}^{\text{vap}}$ ,  $p_{\text{HCl}}^{\text{vap}}$ ,  $p_{\text{HNO}_3}^{\text{vap}}$  and  $p_{\text{CH}_3\text{COOH}}^{\text{vap}}$  calculated using the  
475 Henry's law coefficients listed in Table S2. The activity coefficients of  $\text{H}^+$ ,  $\text{Na}^+$ ,  $\text{Cl}^-$ ,  $\text{NO}_3^-$ ,  $\text{OH}^-$   
476 required for the vapor pressure and concentration simulation are calculated using the Pitzer ion-  
477 interaction model(58, 59). The activity coefficients of organic and neutral species are assumed to  
478 be unity, i.e., they influence the physicochemical properties of SLF as ideal components simply via  
479 Raoult's Law. SLF contains additional ions in minor concentration (Table S1). For all other minor  
480 anions, the activity coefficients of  $\text{Cl}^-$  and the cations the activity coefficients of  $\text{Na}^+$  are used.

481 We obtain the liquid phase diffusion coefficients of ionic and neutral species as well as the efflorescence  
482 RH values from our EDB measurements (Figs. S2, S7). The diffusion coefficients  $D_\ell$  of the involved  
483 species at in infinitely diluted water are given in Table S3. The water activity dependence of the  
484 diffusion coefficients of  $\text{H}_2\text{O}$ ,  $\text{Na}^+$  and  $\text{Cl}^-$  ions are shown in Fig. S7. In the absence of other  
485 information, we assume that  $D_\ell$  of all neutral species have the same dependence on water activity  
486 as  $D_{\ell, \text{H}_2\text{O}}(a_w)$  scaled with their value at infinite dilution. Similarly, the diffusivities of cations and  
487 anions are assumed to have the same as dependence on  $a_w$  as  $\text{Na}^+$  and  $\text{Cl}^-$ , respectively, again  
488 scaled with their dilute solution values from the literature.

489 When RH decreases below efflorescence RH, we assume the resulting NaCl crystal to reside in the  
490 particle center (see Fig. S19). In reality, crystal growth is dendritic (see Fig. S4). We account for  
491 the complexities resulting from dendritic crystal growth by using the effective diffusion constants for  
492 the crystal growth (see Eqn. S13).

493 We then use the model to calculate the pH value, and from this the corresponding virus inactivation  
494 rates, in each particle shell (see Supplementary Material for details). The gas phase compositions of  
495 exhaled air and the indoor air with purification and acidification are shown in Table S4.

496 Note that the current version of ResAM can readily be further refined beyond the conditions used  
497 herein, e.g., to explore the use of alternative acids for aerosol acidification, or to include a greater  
498 diversity of respiratory matrices. The two matrices considered in this work - SLF and nasal mucus -  
499 have comparable thermodynamic and kinetic properties as well as a similar pH-dependence of viral  
500 inactivation. However, we cannot exclude that additional respiratory matrices found in expiratory  
501 aerosol plumes (e.g., saliva) exhibit distinct properties (31, 60).

## 502 Acknowledgements

503 This work was funded by the Swiss National Science Foundation (grant numbers 189939 and 196729).  
504 The authors thank Chuck Haas and Mutian Niu for valuable discussions.



505 **Author contributions**

506 Conceptualization: AN, SS, TK, TP, UKK, WH  
507 Methodology: AS, BL, IG, LKK, MOP, NB, SCD, SS, TK, TP, UKK  
508 Investigation: AS, BL, IG, KV, LKK, MOP, NB, SCD  
509 Visualization: AS, BL, IG, GM, LKK, KV, SCD, TK, TP  
510 Funding acquisition: AN, SS, TK, TP, UKK, WH  
511 Project administration: TK  
512 Supervision: AN, SS, TK, TP, UKK  
513 Writing—original draft: BL, SS, TK, TP  
514 Writing—review & editing: AN, AS, GM, IG, LKK, MOP, NB, SCD, SS, TP, TK, UKK, WH.

515 **Competing interest**

516 Authors declare no competing interests.

517 **Data availability**

518 Experimental data and ResAM code will be made available upon manuscript acceptance. A  
519 preprint was deposited on medRxiv (doi:10.1101/2022.03.14.22272134). It is made available under a  
520 CC-BY-NC-ND 4.0 International license.

- 521 1. J Paget, et al., Global mortality associated with seasonal influenza epidemics: New burden estimates and predictors from the GLaMOR Project. *J. Glob. Heal.* **9**, 020421 (2019).
- 522 2. Clarification of terminology: In physical chemistry, an "aerosol" is a system of colloidal particles dispersed in a fluid, such as air. An "aerosol particle" refers to one single condensed-phase
- 523 element in such an ensemble, which may be solid, liquid or mixed phase. Correspondingly, a "droplet" refers to any liquid aerosol particle, regardless of particle size. In contrast, in epidemiological
- 524 or virological parlance "aerosol" or "aerosol particle" usually means a very small ( $d \lesssim 1 \mu\text{m}$ ) airborne particle, whereas "droplet" is used as its larger counterpart ( $d \gg 1 \mu\text{m}$ ). To avoid this
- 525 confusion, we use the term "particle" to refer to any liquid or mixed-phase respiratory particle of whatever size. Furthermore, we avoid the virological term "virus particle" and use "virus" instead.
- 526 (year?).
- 527 3. CC Wang, et al., Airborne transmission of respiratory viruses. *Science* **373**, eabd9149 (2021).
- 528 4. IL Shechmeister, Studies on the experimental epidemiology of respiratory infections. III. Certain aspects of the behavior of type A influenza virus as an air-borne cloud. *J. Infect. Dis.* **87**, 128–132
- 529 (1950).
- 530 5. JH Hemmes, KC Winkler, SM Kool, Virus survival as a seasonal factor in influenza and poliomyelitis. *Nature* **188**, 430–431 (1960).
- 531 6. GJ Harper, Airborne micro-organisms: survival tests with four viruses. *Epidemiol. & Infect.* **59**, 479–486 (1961).
- 532 7. FL Schaffer, ME Soergel, DC Straube, Survival of airborne influenza virus: Effects of propagating host, relative humidity, and composition of spray fluids. *Arch. Virol.* **51**, 263–273 (1976).
- 533 8. KA Kormuth, et al., Influenza virus infectivity is retained in aerosols and droplets independent of relative humidity. *J. Infect. Dis.* **218**, 739–747 (2018).
- 534 9. M Schuit, et al., The influence of simulated sunlight on the inactivation of influenza virus in aerosols. *J. Infect. Dis.* **221**, 372–378 (2020).
- 535 10. M Schuit, et al., Airborne SARS-CoV-2 is rapidly inactivated by simulated sunlight. *J. Infect. Dis.* **222**, 564–571 (2020).
- 536 11. P Dabisch, et al., The influence of temperature, humidity, and simulated sunlight on the infectivity of SARS-CoV-2 in aerosols. *Aerosol Sci. Technol.* **55**, 142–153 (2021).
- 537 12. N van Doremalen, et al., Aerosol and surface stability of SARS-CoV-2 as compared with SARS-CoV-1. *New Engl. J. Medicine* **382**, 1564–1567 (2020).
- 538 13. MK Ijaz, AH Brunner, SA Sattar, RC Nair, CM Johnson-Lussenburg, Survival characteristics of airborne human coronavirus 229E. *J. Gen. Virol.* **66**, 2743–2748 (1985).
- 539 14. LC Marr, JW Tang, J Van Mullekom, SS Lakdawala, Mechanistic insights into the effect of humidity on airborne influenza virus survival, transmission and incidence. *J. The Royal Soc. Interface* **16**,
- 540 20180298 (2019).
- 541 15. Humidity-dependent decay of viruses, but not bacteria, in aerosols and droplets follows disinfection kinetics. *Environ. Sci. & Technol.* **54**, 1024–1032 (2020).
- 542 16. DH Morris, et al., Mechanistic theory predicts the effects of temperature and humidity on inactivation of SARS-CoV-2 and other enveloped viruses. *eLife* **10**, e65902 (2021).
- 543 17. RJ Weber, H Guo, AG Russell, A Nenes, High aerosol acidity despite declining atmospheric sulfate concentrations over the past 15 years. *Nat. Geosci.* **9**, 282–285 (2016).
- 544 18. C Scholtissek, Stability of infectious influenza A viruses to treatment at low pH and heating. *Arch. Virol.* **85**, 1–11 (1985).
- 545 19. W Yang, LC Marr, Mechanisms by Which Ambient Humidity May Affect Viruses in Aerosols. *Appl. Environ. Microbiol.* **78**, 6781 (2012).
- 546 20. HO Pye, et al., The acidity of atmospheric particles and clouds. *Atmospheric Chem. Phys.* **20**, 4809–4888 (2020).
- 547 21. W Yang, S Elankumaran, LC Marr, Relationship between humidity and influenza A viability in droplets and implications for influenza's seasonality. *PLoS ONE* **7**, e46789 (2012).
- 548 22. Y Huang, The SARS epidemic and its aftermath in China: a political perspective in *Learning from SARS - Preparing for the Next Disease Outbreak: Workshop Summary*. (Institute of Medicine,
- 549 The National Academies Press, Washington DC), pp. 116 – 136 (2004).
- 550 23. T Nah, et al., Characterization of aerosol composition, aerosol acidity, and organic acid partitioning at an agriculturally intensive rural southeastern US site. *Atmospheric Chem. Phys.* **18**,
- 551 11471–11491 (2018).
- 552 24. M Brauer, P Koutrakis, GJ Keeler, JD Spengler, Indoor and outdoor concentrations of inorganic acidic aerosols and gases. *J. Air Waste Manag. Assoc.* **41**, 171–181 (1991).
- 553 25. WW Nazaroff, CJ Weschler, Indoor acids and bases. *Indoor Air* **30**, 559–644 (2020).
- 554 26. L Ampollini, et al., Observations and contributions of real-time indoor ammonia concentrations during HOMEChem. *Environ. Sci. Technol.* **53**, 8591–8598 (2019).
- 555 27. J Vaughan, et al., Exhaled breath condensate pH is a robust and reproducible assay of airway acidity. *Eur. Respir. J.* **22**, 889–894 (2003).
- 556 28. SE Galloway, ML Reed, CJ Russell, DA Steinhauer, Influenza HA subtypes demonstrate divergent phenotypes for cleavage activation and pH of fusion: implications for host range and adaptation.
- 557 *PLoS pathogens* **9**, e1003151–e1003151 (2013).
- 558 29. PA Bullough, FM Hughson, JJ Skehel, DC Wiley, Structure of influenza haemagglutinin at the pH of membrane fusion. *Nature* **371**, 37–43 (1994).
- 559 30. CB Jackson, M Farzan, B Chen, H Choe, Mechanisms of SARS-CoV-2 entry into cells. *Nat. Rev. Mol. Cell Biol.* **23**, 3–20 (2022).
- 560 31. E Huynh, et al., Evidence for a semisolid phase state of aerosols and droplets relevant to the airborne and surface survival of pathogens. *Proc. Natl. Acad. Sci.* **119**, e2109750119 (2022).
- 561 32. HP Oswin, et al., Measuring stability of virus in aerosols under varying environmental conditions. *Aerosol Sci. Technol.* **55**, 1315–1320 (2021).
- 562 33. Y Shao, S Ramachandran, S Arnold, G Ramachandran, Turbulent eddy diffusion models in exposure assessment - Determination of the eddy diffusion coefficient. *J. Occup. Environ. Hyg.* **14**,
- 563 195–206 (2017).
- 564 34. The National Institute for Occupational Safety and Health (NIOSH) - Center of Disease Control and Prevention (CDC), <https://www.cdc.gov/niosh/npg/npgd0447.html>: Time-weighted average
- 565 (TWA) of the Permissible Exposure Limit (PEL), legal 8-hour limit in the United States for exposure of an employee 2 ppm for  $\text{HNO}_3$  (2019).
- 566 35. German Social Accident Insurance (DGUV), <https://limitvalue.ifa.dguv.de/>: National Occupational Exposure Limits (OELs) in the European Union, legal 8-hour limit, 0.5 - 2 ppm for  $\text{HNO}_3$ ,
- 567 depending on country (2022).
- 568 36. ML Pöhlker, et al., Respiratory aerosols and droplets in the transmission of infectious diseases. *arXiv preprint arXiv:2103.01188* (2021).
- 569 37. AV Nicola, AM McEvoy, SE Straus, Roles for endocytosis and low pH in herpes simplex virus entry into HeLa and chinese hamster ovary cells. *J. Virol.* **77**, 5324–5332 (2003).
- 570 38. SF Ausar, et al., Analysis of the thermal and pH stability of human respiratory syncytial virus. *Mol. Pharm.* **2**, 491–499 (2005).
- 571 39. ME Darnell, K Subbarao, SM Feinstone, DR Taylor, Inactivation of the coronavirus that induces severe acute respiratory syndrome, SARS-CoV. *J. virological methods* **121**, 85–91 (2004).
- 572 40. CL Fogh, MA Byrne, J Roed, AJ Goddard, Size specific indoor aerosol deposition measurements and derived I/O concentrations ratios. *Atmospheric Environ.* **31**, 2193–2203 (1997).
- 573 41. JA Neuman, LG Huey, TB Ryerson, DW Fahey, Study of inlet materials for sampling atmospheric nitric acid. *Environ. Sci. Technol.* **33**, 1133–1136 (1999).
- 574 42. SHE van den Worm, et al., Reverse genetics of SARS-related coronavirus using vaccinia virus-based recombination. *PLoS ONE* **7**, e32857 (2012).
- 575 43. R Wölfel, et al., Virological assessment of hospitalized patients with COVID-2019. *Nature* **581**, 465–469 (2020).
- 576 44. EE Spieler, E Moritz, S Stertz, BG Hale, Application of a biologically contained reporter system to study gain-of-function H5N1 influenza A viruses with pandemic potential. *mSphere* **5**, e00423–20
- 577 (2020).
- 578 45. EM Bicer, Ph.D. thesis (King's College London) (2014).
- 579 46. M Hassoun, PG Royall, M Parry, RD Harvey, B Forbes, Design and development of a biorelevant simulated human lung fluid. *J. Drug Deliv. Sci. Technol.* **47**, 485–491 (2018).
- 580 47. I Busnadiego, et al., Antiviral activity of type I, II, and III interferons counterbalances ACE2 inducibility and restricts SARS-CoV-2. *mBio* **11**, e01928–20 (2020).
- 581 48. EJ Davis, MF Buehler, TL Ward, The double-ring electrodynamic balance for microparticle characterization. *Rev. Sci. Instruments* **61**, 1281–1288 (1990).
- 582 49. CA Colberg, UK Krieger, T Peter, Morphological investigations of single levitated  $\text{H}_2\text{SO}_4/\text{NH}_3/\text{H}_2\text{O}$  aerosol particles during deliquescence/efflorescence experiments. *J. Phys. Chem. A* **108**,
- 583 2700–2709 (2004).
- 584 50. SS Steimer, et al., Electrodynamic balance measurements of thermodynamic, kinetic, and optical aerosol properties inaccessible to bulk methods. *Atmospheric Meas. Tech.* **8**, 2397–2408 (2015).
- 585 51. AE Haddrell, JF Davies, A Yabushita, JP Reid, Accounting for changes in particle charge, dry mass and composition occurring during studies of single levitated particles. *J. Phys. Chem. A* **116**,
- 586 9941–9953 (2012).
- 587 52. IN Tang, HR Munkelwitz, Water activities, densities, and refractive indices of aqueous sulfates and sodium nitrate droplets of atmospheric importance. *J. Geophys. Res. Atmospheres* **99**,
- 588 18801–18808 (1994).
- 589 53. AA Zardini, et al., A combined particle trap/HTDMA hygroscopicity study of mixed inorganic/organic aerosol particles. *Atmospheric Chem. Phys.* **8**, 5589–5601 (2008).
- 590 54. P Chylek, Partial-wave resonances and the ripple structure in the Mie normalized extinction cross section. *JOSA* **66**, 285–287 (1976).
- 591 55. B Zobrist, et al., Ultra-slow water diffusion in aqueous sucrose glasses. *Phys. Chem. Chem. Phys.* **13**, 3514–3526 (2011).
- 592 56. S Bastelberger, UK Krieger, B Luo, T Peter, Diffusivity measurements of volatile organics in levitated viscous aerosol particles. *Atmospheric Chem. Phys.* **17**, 8453–8471 (2017).
- 593 57. J Dou, et al., Photochemical degradation of iron(III) citrate/citric acid aerosol quantified with the combination of three complementary experimental techniques and a kinetic process model.
- 594 *Atmospheric Chem. Phys.* **21**, 315–338 (2021).
- 595 58. KS Carslaw, SL Clegg, P Brimblecombe, A thermodynamic model of the system  $\text{HCl-HNO}_3\text{-H}_2\text{SO}_4\text{-H}_2\text{O}$ , including solubilities of HBr, from <200 to 328 K. *J. Phys. Chem.* **99**, 11557–11574
- 596 (1995).
- 597 59. B Luo, KS Carslaw, T Peter, SL Clegg, Vapour pressures of  $\text{H}_2\text{SO}_4/\text{HNO}_3/\text{HCl}/\text{HBr}/\text{H}_2\text{O}$  solutions to low stratospheric temperatures. *Geophys. Res. Lett.* **22**, 247–250 (1995).
- 598 60. R Groth, LT Cravigan, S Niaz, Z Ristovski, GR Johnson, In situ measurements of human cough aerosol hygroscopicity. *J. Royal Soc. Interface* **18**, 20210209 (2021).
- 599 61. CR Bodem, LM Lampton, DP Miller, EF Tarka, ED Everett, Endobronchial pH: relevance to aminoglycoside activity in gram-negative bacillary pneumonia. *Am. Rev. Respir. Dis.* **127**, 39–41 (1983).
- 600 62. D Choudhury, et al., Endoscopic sensing of alveolar pH. *Biomed. Opt. Express* **8**, 243–259 (2017).
- 601 63. B Holma, Effects of inhaled acids on airway mucus and its consequences for health. *Environ. Heal. Perspectives* **79**, 109–113 (1989).
- 602 64. D Kim, J Liao, JW Hanrahan, The buffer capacity of airway epithelial secretions. *Front. Physiol.* **5**, 188 (2014).
- 603 65. SL Clegg, P Brimblecombe, AS Wexler, Thermodynamic model of the system  $\text{H}^+\text{-NH}_4^+\text{-SO}_4^{2-}\text{-NO}_3^-\text{-H}_2\text{O}$  at tropospheric temperatures. *J. Phys. Chem. A* **102**, 2137–2154 (1998).

- 604 66. CK Chan, Z Liang, J Zheng, SL Clegg, P Brimblecombe, Thermodynamic properties of aqueous aerosols to high supersaturation: I—measurements of water activity of the system  $\text{Na}^+$ -  
605  $\text{Cl}^-$ - $\text{NO}_3^-$ - $\text{SO}_4^{2-}$ - $\text{H}_2\text{O}$  at  $\sim 298.15$  K. *Aerosol Sci. Technol.* **27**, 324–344 (1997).
- 606 67. P Banerjee, B Bagchi, Ions' motion in water. *J. Chem. Phys.* **150**, 190901 (2019).
- 607 68. S Staunton, Diffusion processes in *Encyclopedia of Soil Science*, ed. W Chesworth. (Springer Netherlands), pp. 185–191 (2008).
- 608 69. JP Péraud, et al., Low mach number fluctuating hydrodynamics for electrolytes. *Phys. Rev. Fluids* **1**, 074103 (2016).
- 609 70. D Gillespie, W Nonner, RS Eisenberg, Coupling Poisson-Nernst-Planck and density functional theory to calculate ion flux. *J. Phys. Condens. Matter* **14**, 12129–12145 (2002).
- 610 71. H Pruppacher, J Klett, Microstructure of Atmospheric Clouds and Precipitation in *Microphysics of Clouds and Precipitation*. (Springer, Dordrecht, Dordrecht), 2 edition, pp. 10–73 (2010).
- 611 72. S Balachandrar, S Zaleski, A Soldati, G Ahmadi, L Bourouiba, Host-to-host airborne transmission as a multiphase flow problem for science-based social distance guidelines. *Int. J. Multiph. Flow*  
612 **132**, 103439 (2020).
- 613 73. M Rosti, S Olivieri, M Cavaola, A Seminara, A Mazzino, Fluid dynamics of covid-19 airborne infection suggests urgent data for a scientific design of social distancing. *Sci. Reports* **10**, 1–9 (2020).
- 614 74. J Wang, et al., Short-range exposure to airborne virus transmission and current guidelines. *Proc. Natl. Acad. Sci.* **118** (2021).
- 615 75. E Berry, Relative humidity of expired air. *Am. Phys. Educ. Rev.* **19**, 452–454 (1914).
- 616 76. HC Berg, *Random Walks in Biology*. (Princeton University Press, Princeton NJ), (1993).
- 617 77. DM Murphy, T Koop, Review of the vapour pressures of ice and supercooled water for atmospheric applications. *Q. J. Royal Meteorol. Soc.* **131**, 1539–1565 (2005).
- 618 78. Y Nishihama, et al., Indoor air quality of 5,000 households and its determinants. Part A: Particulate matter (PM<sub>2.5</sub> and PM<sub>10–2.5</sub>) concentrations in the Japan Environment and Children's Study.  
619 *Environ. Res.* **198**, 111196 (2021).
- 620 79. JH Seinfeld, SN Pandis, *Atmospheric chemistry and physics: from air pollution to climate change*. (J. Wiley, Hoboken, N.J), 6th edition, (2006).
- 621 80. JF Bourgeois, F Barja, The history of vinegar and of its acetification systems. *Arch. des Sci.* **62**, 147–160 (2009).
- 622 81. JS Groatorex, et al., Effectiveness of common household cleaning agents in reducing the viability of human influenza A/H1N1. *PLoS ONE* **5**, e8987 (2010).
- 623 82. I Pagani, et al., <https://www.biorxiv.org/content/10.1101/2020.07.08.193193v2.abstract>: Vinegar and Its Active Component Acetic Acid Inhibit SARS-CoV-2 Infection In Vitro and Ex Vivo. *bioRxiv* :  
624 *preprint server for biology* p. 2020.07.08.193193 (2020).
- 625 83. AA Zardini, UK Krieger, C Marcolli, White light Mie resonance spectroscopy used to measure very low vapor pressures of substances in aqueous solution aerosol particles. *Opt. Express* **14**, 6951  
626 (2006).
- 627 84. AA Zardini, UK Krieger, Evaporation kinetics of a non-spherical, levitated aerosol particle using optical resonance spectroscopy for precision sizing. *Opt. Express* **17**, 4659–4669 (2009).
- 628 85. JS Walker, et al., Accurate representations of the microphysical processes occurring during the transport of exhaled aerosols and droplets. *ACS Cent. Sci.* **7**, 200–209 (2021).
- 629 86. VG Ciobanu, C Marcolli, UK Krieger, U Weers, T Peter, Liquid-liquid Phase separation in mixed organic/inorganic aerosol particles. *J. Phys. Chem. A* **113**, 10966–10978 (2009).
- 630 87. A Kumar, et al., A biocompatible synthetic lung fluid based on human respiratory tract lining fluid composition. *Pharm. Res.* **34**, 2454–2465 (2017).
- 631 88. C Braun, UK Krieger, Two-dimensional angular light-scattering in aqueous NaCl single aerosol particles during deliquescence and efflorescence. *Opt. Express* **8**, 314–321 (2001).
- 632 89. AV Bandura, SN Lvov, The ionization constant of water over wide ranges of temperature and density. *J. Phys. Chem. Ref. Data* **35**, 15–30 (2006).
- 633 90. JJ Renard, SE Calidonna, MV Henley, Fate of ammonia in the atmosphere - A review for applicability to hazardous releases. *J. Hazard. Mater.* **108**, 29–60 (2004).
- 634 91. R Sander, Compilation of Henry's law constants (version 4.0) for water as solvent. *Atmospheric Chem. Phys.* **15**, 4399–4981 (2015).
- 635 92. HS Harned, RW Ehlers, The dissociation constant of acetic acid from 0 to 60° centigrade. *J. Am. Chem. Soc.* **55**, 652–656 (1933).
- 636 93. JW Morse, FT Mackenzie, *Geochemistry of Sedimentary Carbonates*. (Amsterdam) Vol. 48, (1990).
- 637 94. RJ Woosley, Evaluation of the temperature dependence of dissociation constants for the marine carbon system using pH and certified reference materials. *Mar. Chem.* **229**, 103914 (2021).
- 638 95. SP Pinho, EA Macedo, Solubility of NaCl, NaBr, and KCl in water, methanol, ethanol, and their mixed solvents. *J. Chem. Eng. Data* **50**, 29–32 (2005).
- 639 96. PR Roberge, *Corrosion Engineering - Principles and Practice*. (McGraw-Hill), (2008).
- 640 97. MJW Frank, JAM Kuipers, WPM Van Swaaij, Diffusion Coefficients and Viscosities of  $\text{CO}_2 + \text{H}_2\text{O}$ ,  $\text{CO}_2 + \text{CH}_3\text{OH}$ ,  $\text{NH}_3 + \text{H}_2\text{O}$ , and  $\text{NH}_3 + \text{CH}_3\text{OH}$  Liquid Mixtures. *J. Chem. Eng.*  
641 *Data* **41**, 297–302 (1996).
- 642 98. JU Kreft, C Picioreanu, JW Wimpenny, MC Van Loosdrecht, Individual-based modelling of biofilms. *Microbiology* **147**, 2897–2912 (2001).
- 643 99. K Dryahina, et al., Exhaled breath concentrations of acetic acid vapour in gastro-esophageal reflux disease. *J. Breath Res.* **8**, 037109 (2014).
- 644 100. D Smith, et al., Breath concentration of acetic acid vapour is elevated in patients with cystic fibrosis. *J. Breath Res.* **10**, 021002 (2016).
- 645 101. G Ejaimi, S Saeed, An introduction to airway assessment and management (concise airway anatomy and pathophysiology). *Annals Int. medical Dental Res.* **3**, 1–7 (2016).
